# Supplementary material for: Rapid Onsite Visual Detection of Orf Virus Using a Recombinase-Aided Amplification Assay
Source: MDPI journal article supplement (doi:10.3390/life13020494), 2023-02-10
Supplement: s1 [file s1]

**Supplementary Table S1.** Clinical details for skin tissues samples.

| <b>Serial<br/>number</b> | <b>Sample<br/>condition</b> | <b>Time</b> | <b>Host <sup>a</sup></b> | <b>Location</b>               |
|--------------------------|-----------------------------|-------------|--------------------------|-------------------------------|
| 1                        | Positive                    | 2021.01.25  | sheep                    | China: Hebei,<br>Baoding      |
| 2                        | Positive                    | 2021.01.25  | sheep                    | China: Hebei,<br>Baoding      |
| 3                        | Positive                    | 2021.01.25  | sheep                    | China: Hebei,<br>Baoding      |
| 4                        | Positive                    | 2021.01.25  | goat                     | China: Hebei,<br>Baoding      |
| 5                        | Positive                    | 2021.01.25  | goat                     | China: Hebei,<br>Baoding      |
| 6                        | Positive                    | 2021.01.26  | sheep                    | China: Hebei,<br>Cangzhou     |
| 7                        | Positive                    | 2021.01.26  | sheep                    | China: Hebei,<br>Cangzhou     |
| 8                        | Positive                    | 2021.01.28  | goat                     | China: Hebei,<br>Xingtai      |
| 9                        | Positive                    | 2021.01.28  | goat                     | China: Hebei,<br>Xingtai      |
| 10                       | Positive                    | 2021.01.29  | sheep                    | China: Hebei,<br>Shijiazhuang |
| 11                       | Positive                    | 2021.01.29  | sheep                    | China: Hebei,<br>Shijiazhuang |
| 12                       | Positive                    | 2021.01.29  | goat                     | China: Hebei,<br>Shijiazhuang |
| 13                       | Positive                    | 2021.01.29  | goat                     | China: Hebei,<br>Shijiazhuang |
| 14                       | Positive                    | 2021.02.15  | sheep                    | China: Hebei,<br>Shijiazhuang |
| 15                       | Positive                    | 2021.02.15  | sheep                    | China: Hebei,<br>Shijiazhuang |
| 16                       | Positive                    | 2021.02.15  | sheep                    | China: Hebei,<br>Shijiazhuang |
| 17                       | Positive                    | 2021.02.15  | sheep                    | China: Hebei,<br>Shijiazhuang |
| 18                       | Positive                    | 2021.02.18  | goat                     | China: Hebei,<br>Baoding      |
| 19                       | Positive                    | 2021.02.18  | goat                     | China: Hebei,<br>Baoding      |
| 20                       | Positive                    | 2021.02.18  | goat                     | China: Hebei,<br>Baoding      |

|    |          |            |       |                              |
|----|----------|------------|-------|------------------------------|
| 21 | Positive | 2021.02.18 | goat  | China: Hebei,<br>Baoding     |
| 22 | Positive | 2021.02.18 | goat  | China: Hebei,<br>Baoding     |
| 23 | Positive | 2021.02.18 | goat  | China: Hebei,<br>Baoding     |
| 24 | Positive | 2021.02.22 | sheep | China: Hebei,<br>Dingzhou    |
| 25 | Positive | 2021.02.24 | goat  | China: Hebei,<br>Baoding     |
| 26 | Positive | 2021.02.24 | goat  | China: Hebei,<br>Baoding     |
| 27 | Positive | 2021.02.24 | goat  | China: Hebei,<br>Baoding     |
| 28 | Positive | 2021.02.25 | sheep | China: Hebei,<br>Dingzhou    |
| 29 | Positive | 2021.02.26 | goat  | China: Hebei,<br>Handan      |
| 30 | Positive | 2021.02.26 | goat  | China: Hebei,<br>Handan      |
| 31 | Positive | 2021.02.26 | sheep | China: Hebei,<br>Handan      |
| 32 | Positive | 2021.02.26 | goat  | China: Hebei,<br>Handan      |
| 33 | Positive | 2021.02.26 | goat  | China: Hebei,<br>Handan      |
| 34 | Positive | 2021.02.26 | goat  | China: Hebei,<br>Handan      |
| 35 | Positive | 2021.03.12 | sheep | China: Hebei,<br>Baoding     |
| 36 | Positive | 2021.03.12 | goat  | China: Hebei,<br>Baoding     |
| 37 | Positive | 2021.03.12 | goat  | China: Hebei,<br>Baoding     |
| 38 | Positive | 2021.03.15 | sheep | China: Hebei,<br>Baoding     |
| 39 | Positive | 2021.03.15 | sheep | China: Hebei,<br>Baoding     |
| 40 | Negative | 2021.01.28 | goat  | China: Hebei,<br>Zhangjiakou |
| 41 | Negative | 2021.01.28 | sheep | China: Hebei,<br>Zhangjiakou |
| 42 | Negative | 2021.01.28 | sheep | China: Hebei,<br>Zhangjiakou |

|    |          |            |       |                              |
|----|----------|------------|-------|------------------------------|
| 43 | Negative | 2021.02.03 | goat  | China: Hebei,<br>Qinhuangdao |
| 44 | Negative | 2021.02.03 | goat  | China: Hebei,<br>Qinhuangdao |
| 45 | Negative | 2021.02.03 | sheep | China: Hebei,<br>Qinhuangdao |
| 46 | Negative | 2021.02.03 | goat  | China: Hebei,<br>Qinhuangdao |
| 47 | Negative | 2021.02.12 | sheep | China: Hebei,<br>Baoding     |
| 48 | Negative | 2021.02.12 | sheep | China: Hebei,<br>Baoding     |
| 49 | Negative | 2021.02.15 | goat  | China: Hebei,<br>Baoding     |
| 50 | Negative | 2021.02.15 | goat  | China: Hebei,<br>Baoding     |
| 51 | Negative | 2021.02.17 | sheep | China: Hebei,<br>Zhangjiakou |
| 52 | Negative | 2021.02.17 | goat  | China: Hebei,<br>Zhangjiakou |
| 53 | Negative | 2021.02.17 | goat  | China: Hebei,<br>Zhangjiakou |
| 54 | Negative | 2021.02.17 | sheep | China: Hebei,<br>Zhangjiakou |
| 55 | Negative | 2021.02.20 | goat  | China: Hebei,<br>Baoding     |
| 56 | Negative | 2021.02.20 | sheep | China: Hebei,<br>Baoding     |
| 57 | Negative | 2021.02.20 | goat  | China: Hebei,<br>Baoding     |
| 58 | Negative | 2021.02.20 | goat  | China: Hebei,<br>Baoding     |
| 59 | Negative | 2021.02.26 | sheep | China: Hebei,<br>Dingzhou    |
| 60 | Negative | 2021.02.26 | goat  | China: Hebei,<br>Baoding     |
| 61 | Negative | 2021.02.27 | sheep | China: Hebei,<br>Zhangjiakou |
| 62 | Negative | 2021.02.27 | sheep | China: Hebei,<br>Zhangjiakou |
| 63 | Negative | 2021.03.12 | goat  | China: Hebei,<br>Baoding     |
| 64 | Negative | 2021.03.12 | goat  | China: Hebei,<br>Baoding     |

|    |          |            |       |                           |
|----|----------|------------|-------|---------------------------|
| 65 | Negative | 2021.03.12 | goat  | China: Hebei,<br>Baoding  |
| 66 | Negative | 2021.03.15 | sheep | China: Hebei,<br>Baoding  |
| 67 | Negative | 2021.03.15 | goat  | China: Hebei,<br>Baoding  |
| 68 | Negative | 2021.03.15 | goat  | China: Hebei,<br>Baoding  |
| 69 | Negative | 2021.03.16 | sheep | China: Hebei,<br>Dingzhou |
| 70 | Negative | 2021.03.16 | sheep | China: Hebei,<br>Dingzhou |
| 71 | Negative | 2021.03.16 | sheep | China: Hebei,<br>Dingzhou |
| 72 | Negative | 2021.03.16 | sheep | China: Hebei,<br>Dingzhou |
| 73 | Negative | 2021.03.17 | goat  | China: Hebei,<br>Baoding  |
| 74 | Negative | 2021.03.17 | goat  | China: Hebei,<br>Baoding  |
| 75 | Negative | 2021.03.18 | sheep | China: Hebei,<br>Baoding  |
| 76 | Negative | 2021.03.18 | sheep | China: Hebei,<br>Baoding  |
| 77 | Negative | 2021.03.18 | sheep | China: Hebei,<br>Baoding  |
| 78 | Negative | 2022.03.27 | goat  | China: Hebei,<br>Dingzhou |

---

<sup>a</sup> Each sample was from a different sheep or goat.
